# Supplementary material
Source: PubMed Central journal article supplement (PMC3921101)
Supplement: NIHMS56140-supplement-1.pdf [file NIHMS56140-supplement-1.pdf]

## **SUPPLEMENTAL DATA**

### **Suppl. Video 1**

Induction of slow L-selectin mediated rolling by DREG-55 mAb.

Jurkat cells show L-selectin mediated rolling at steady state on immobilized PSGL-1 in a parallel plate flow chamber at  $1.5 \text{ dyn/cm}^2$ .  $10 \text{ }\mu\text{g/ml}$  anti-L-selectin antibody DREG-55 was added to the flow buffer without interruption of the flow. Magnification  $10\times$ . Detailed analysis of the rolling velocity is shown in figures 1 and 2 and in suppl. video 2.

## **Suppl. Video 2**

L-selectin-mediated rolling in high temporal resolution

Untreated (top) and 10  $\mu\text{g/ml}$  DREG-55 mAb treated (bottom) Jurkat cells rolling on 6  $\mu\text{g/ml}$  immobilized PSGL-1 at  $0.96 \text{ dyn/cm}^2$ . Time-lapse video with a total duration of 1000 ms recorded at 100 fps and at  $40\times$  magnification. Scale bar shows 20  $\mu\text{m}$ . Automatic cell tracking was performed as indicated in materials and methods and the velocity analysis is shown in figure 2.
